# Supplementary material for: Pharmacokinetic Comparative Study of Gastrodin and Rhynchophylline after Oral Administration of Different Prescriptions of Yizhi Tablets in Rats by an HPLC‐ESI/MS Method
Source: Hindawi journal article supplement (doi:10.1155/2014/167253), 2014-01-01
Supplement: f1 [file 167253.f1.pdf]

| Peak no | t <sub>R</sub> (min) | Selected ion       | Formula                                                        | Measured mass(m/z) | Calculated mass(m/z) | Error   |         | DBE  | Compound                          |
|---------|----------------------|--------------------|----------------------------------------------------------------|--------------------|----------------------|---------|---------|------|-----------------------------------|
|         |                      |                    |                                                                |                    |                      | mDa     | ppm     |      |                                   |
| 1       | 10.325               | [M-H] <sup>-</sup> | C <sub>13</sub> H <sub>17</sub> O <sub>7</sub>                 | 285.0961           | 285.0974             | -1.3281 | -4.6586 | 5.5  | Gastrodin*                        |
| 2       | 16.26                | [M-H] <sup>-</sup> | C <sub>10</sub> H <sub>8</sub> O <sub>4</sub>                  | 191.0348           | 191.0344             | 0.3661  | 1.9167  | 7.5  | Scopoletin                        |
| 3       | 21.959               | [M-H] <sup>-</sup> | C <sub>15</sub> H <sub>14</sub> O <sub>6</sub>                 | 289.0722           | 289.0712             | 0.9866  | 3.4131  | 9.5  | Epicatechin                       |
| 4       | 37.917               | [M-H] <sup>-</sup> | C <sub>27</sub> H <sub>34</sub> N <sub>2</sub> O <sub>9</sub>  | 529.2189           | 529.2186             | 0.2939  | 0.5553  | 12.5 | Vincoside/Strictosidine           |
| 5       | 48.175               | [M-H] <sup>-</sup> | C <sub>27</sub> H <sub>34</sub> N <sub>2</sub> O <sub>9</sub>  | 529.2184           | 529.2186             | -0.2060 | -0.3894 | 12.5 | Vincoside/Strictosidine           |
| 6       | 49.152               | [M-H] <sup>-</sup> | C <sub>26</sub> H <sub>30</sub> N <sub>2</sub> O <sub>8</sub>  | 497.1918           | 497.1923             | -0.5912 | -1.1892 | 13.5 | Vincoside<br>Lactam/Strictosamide |
| 7       | 46.004               | [M-H] <sup>-</sup> | C <sub>26</sub> H <sub>30</sub> N <sub>2</sub> O <sub>8</sub>  | 497.1914           | 497.1923             | -0.9912 | -1.9937 | 13.5 | Vincoside<br>Lactam/Strictosamide |
| 8       | 50.039               | [M-H] <sup>-</sup> | C <sub>22</sub> H <sub>26</sub> N <sub>2</sub> O <sub>4</sub>  | 381.1817           | 381.1814             | 0.2674  | 0.7015  | 11.5 | (Iso)Corynoxene                   |
| 9       | 52.011               | [M-H] <sup>-</sup> | C <sub>22</sub> H <sub>26</sub> N <sub>2</sub> O <sub>4</sub>  | 381.1805           | 381.1814             | -0.9325 | -2.4465 | 11.5 | (Iso)Corynoxene                   |
| 10      | 53.151               | [M-H] <sup>-</sup> | C <sub>22</sub> H <sub>28</sub> N <sub>2</sub> O <sub>4</sub>  | 383.1970           | 383.1970             | -0.0826 | -0.2157 | 10.5 | Rhynchophylline*                  |
| 11      | 47.524               | [M-H] <sup>-</sup> | C <sub>27</sub> H <sub>34</sub> N <sub>2</sub> O <sub>10</sub> | 545.2134           | 545.2135             | -0.1207 | -0.2214 | 12.5 | Dihydrocadambine                  |

|    |        |                    |                                                               |          |          |         |         |      |                          |
|----|--------|--------------------|---------------------------------------------------------------|----------|----------|---------|---------|------|--------------------------|
| 12 | 41.734 | [M-H] <sup>-</sup> | C <sub>21</sub> H <sub>26</sub> N <sub>2</sub> O <sub>4</sub> | 369.1818 | 369.1814 | 0.3674  | 0.9952  | 10.5 | (Iso)Rhynchophyllic Acid |
| 13 | 42.494 | [M-H] <sup>-</sup> | C <sub>21</sub> H <sub>26</sub> N <sub>2</sub> O <sub>4</sub> | 369.1817 | 369.1814 | 0.2674  | 0.7243  | 10.5 | (Iso)Rhynchophyllic Acid |
| 14 | 51.142 | [M-H] <sup>-</sup> | C <sub>22</sub> H <sub>28</sub> N <sub>2</sub> O <sub>4</sub> | 383.1973 | 383.1970 | 0.2173  | 0.5671  | 10.5 | Corynoxine               |
| 15 | 41.427 | [M-H] <sup>-</sup> | C <sub>21</sub> H <sub>24</sub> N <sub>2</sub> O <sub>4</sub> | 367.1663 | 367.1657 | 0.5175  | 1.4094  | 11.5 | (Iso)Pteropodine         |
| 16 | 42.874 | [M-H] <sup>-</sup> | C <sub>21</sub> H <sub>24</sub> N <sub>2</sub> O <sub>4</sub> | 367.1656 | 367.1657 | -0.1824 | -0.4970 | 11.5 | (Iso)Pteropodine         |

## Supplementary

Tables S1 Main components identified in Yizhi Tablet by HPLC-MS

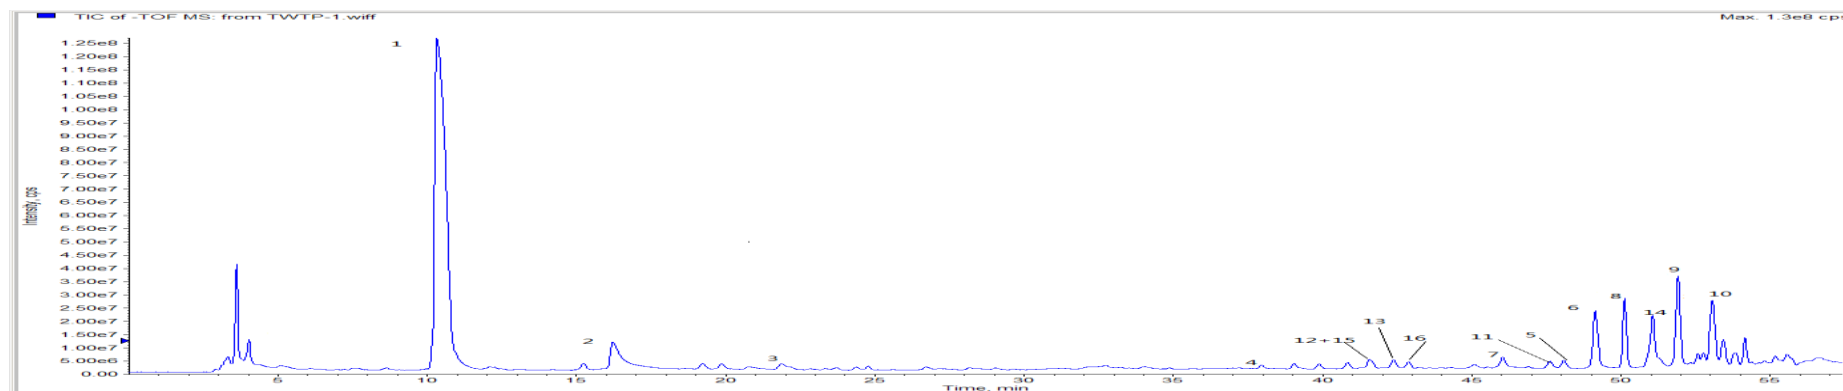

Fig.S1 Total ion chromatogram (TIC) profile of Yizhi Tablet (negative ion mode). The number of peaks marked in Fig.S1 is corresponding to Table S1.
